# Supplementary material for: Metal-free azo-bridged porphyrin porous organic polymers for visible-light-driven CO2 reduction to CO with high selectivity
Source: Royal Society of Chemistry journal article supplement (doi:10.1039/d0dt01436b), 2020-01-01
Supplement: d0dt01436b1.pdf [file d0dt01436b1.pdf]

## Electronic Supplementary Information

### **Metal-free Azo-bridged Porphyrin Porous Organic Polymers for Visible-light-driven CO<sub>2</sub> Reduction to CO with High Selectivity**

Yuxia Hou,<sup>a</sup> Enhui Zhang,<sup>a</sup> Jiayin Gao,<sup>a</sup> Shuaiqi Zhang,<sup>a</sup> Ping Liu,<sup>a</sup> Ji-Chao Wang,<sup>\*a</sup>

Yuping Zhang,<sup>a</sup> Cheng-Xing Cui,<sup>\*a</sup> and Jianzhuang Jiang<sup>\*b</sup>

---

<sup>a</sup> Y. Hou, E. Zhang, J. Gao, S. Zhang, P. Liu, J. Wang, Y. Zhang, C. Cui

Department of Chemistry and Chemical Engineering

Henan Institute of Science and Technology

Xinxiang, 453003 (China)

<sup>b</sup> Prof. J. Jiang

Beijing Key Laboratory for Science and Application of Functional Molecular and

Crystalline Materials

Department of Chemistry

University of Science and Technology Beijing

Beijing, 100083 (China)

## **1. Physical measurements**

Fourier transform infrared (FT-IR) spectra were performed as KBr pellets using a Bruker Tensor 37 spectrometer with  $2\text{ cm}^{-1}$  resolution. Powder X-ray diffraction (PXRD) data were collected on a Bruker D8 Advance XRD diffractometer using Cu-K $\alpha$  radiation ( $\lambda = 1.54060\text{ \AA}$ ) at room temperature. Transmission electron microscopy (TEM) images were measured on a JEOL JEM-2100 electron microscope operated at 200 kV. Scanning electron microscopy (SEM) images were obtained using a JEOL JEM-6510A scanning electron microscopy. For TEM imaging, a drop of freshly prepared sample solution was cast onto a carbon copper grid. For SEM imaging, a drop of freshly prepared sample solution was cast onto a silicon slice, and then Au (1-2 nm) was sputtered onto the grids to prevent charging effects and to improve the image clarity. X-ray photoelectron spectroscopy (XPS) was carried out on PHI 5300 ESCA System (Perkin-Elmer, USA). The excitation source is Al K $\alpha$  radiation.  $^{13}\text{C}$  CP/MAS NMR experiments were performed on Bruker AVANCE III 600 spectrometer at a resonance frequency of 150.9 MHz.

## **2. Photoelectrochemical characterization.**

The photocurrent measurement were performed on three-electrode system using an electrochemical workstation. The cleaned ITO glass deposited with samples, Pt and Ag/AgCl electrode were used as working electrode, counter electrode, and reference electrode, respectively. The light source was a 300 W Xe lamp equipped with an ultraviolet cutoff filter ( $> 400\text{ nm}$ ) and 0.05 M  $\text{Na}_2\text{SO}_4$  aqueous solution acted as the electrolyte.

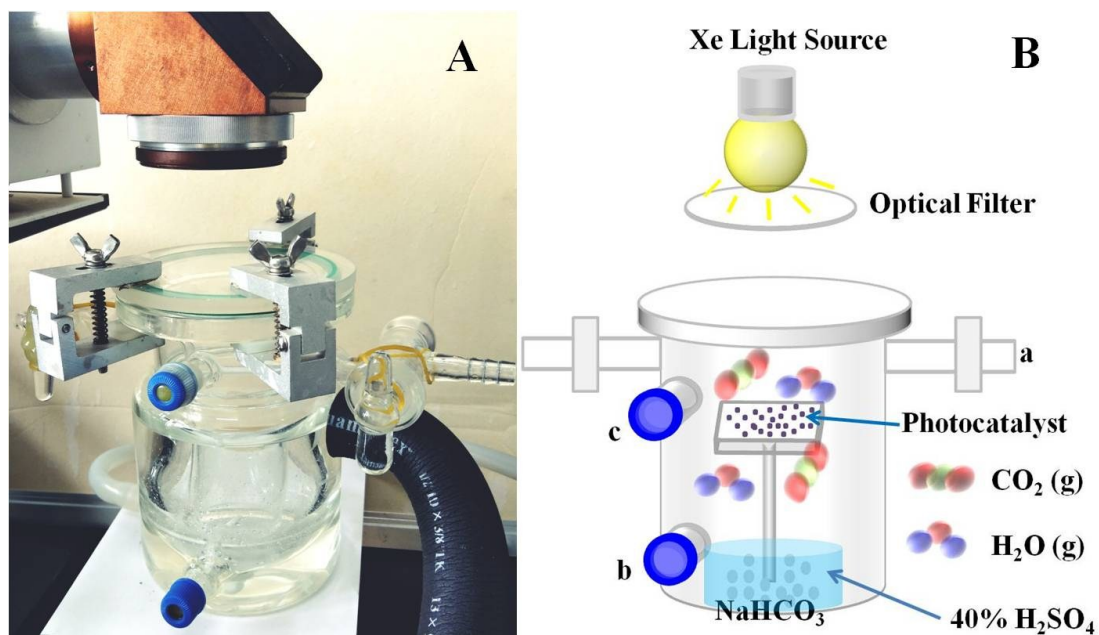

**Fig. S1** (A) The photograph of the photoreactor and the schematic of the photocatalysis test process.

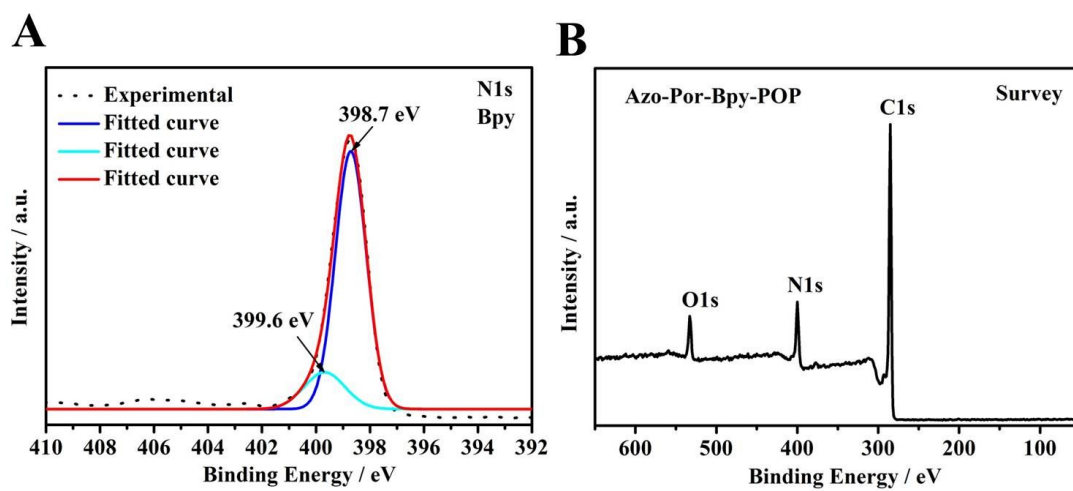

**Fig. S2** (A) the XPS spectrum of Bpy and (B) XPS survey spectrum of Azo-Por-Bpy-POP.

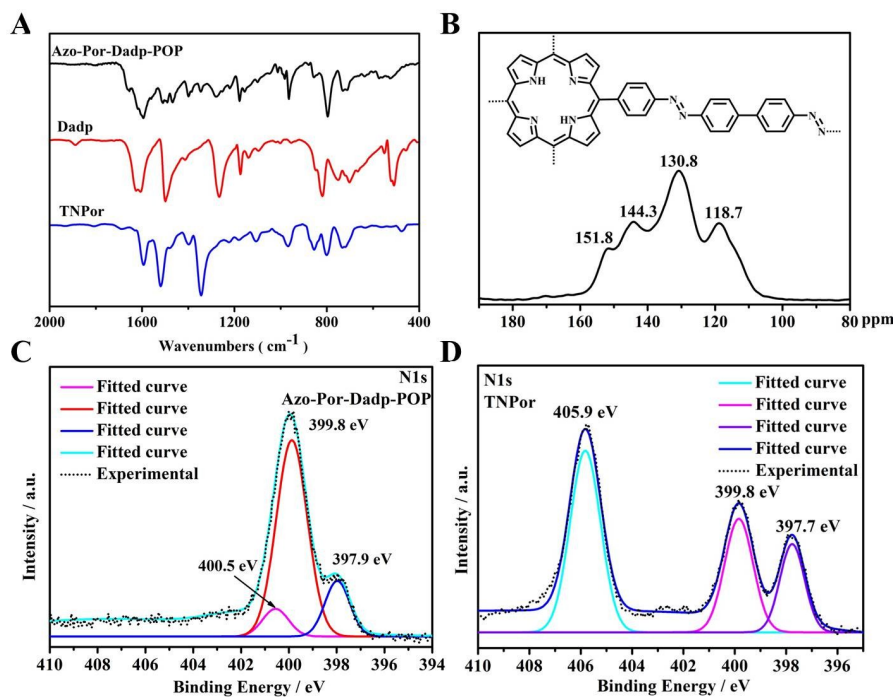

**Fig. S3** (A) FT-IR spectra of Dadp, TNPP, and Azo-Por-Dadp-POP; (B)  $^{13}\text{C}$  CP-MAS NMR spectrum of Azo-Por-Dadp-POP; (C, D) the XPS spectra of Azo-Por-Dadp-POP and TNPor.

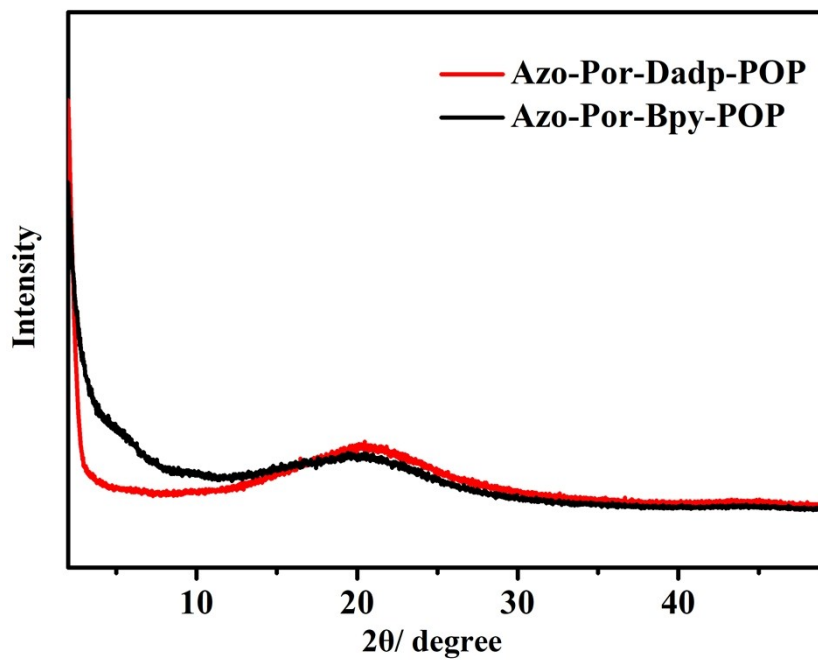

**Fig. S4** Experimental PXRD patterns of Azo-Por-Bpy-POP (black) and Azo-Por-Dadp-POP (red).

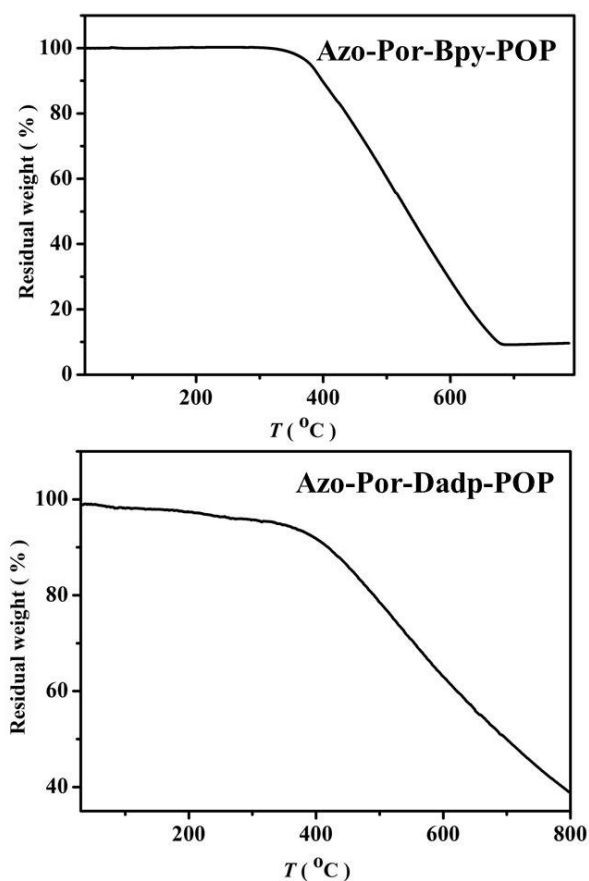

**Fig. S5** Thermogravimetric analysis (TGA) data of **Azo-Por-Bpy-POP** and **Azo-Por-Dadp-POP**.

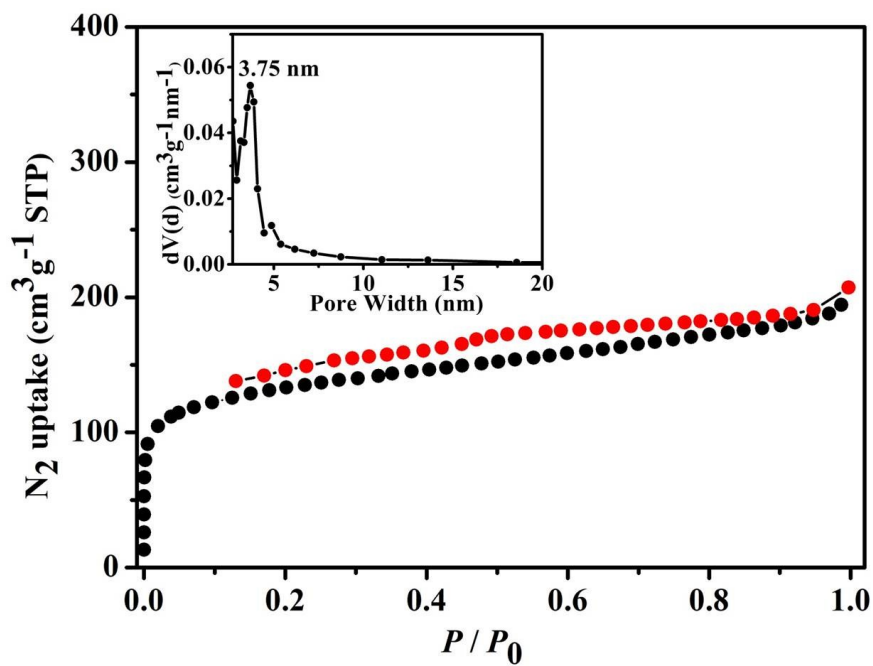

**Fig. S6** Nitrogen adsorption-desorption isotherms of **Azo-Por-Dadp-POP** (A), insets: the pore size distribution.

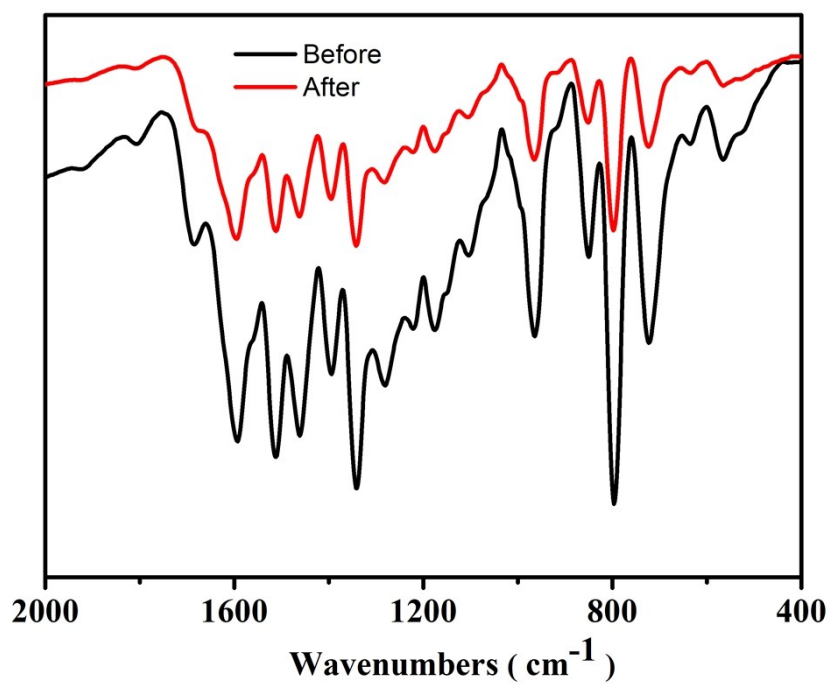

**Fig. S7** the FT-IR spectra of Azo-Por-Bpy-POP before (black) and after (red) photocatalysis.

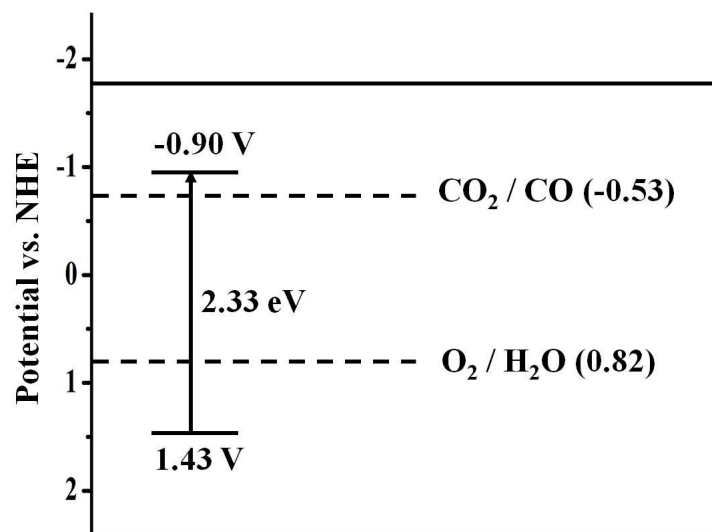

**Fig. S8** The electronic band structure of Azo-Por-Bpy-POP.
